1 Abbreviated Title: Alpha and Pain Sensitivity

2 Sensorimotor peak alpha frequency is a reliable biomarker of pain sensitivity

3 Andrew J. Furman<sup>1,2,3</sup>, Mariya Prokhorenko<sup>2</sup>, Michael L. Keaser<sup>2,3</sup>, Jing Zhang<sup>2</sup>, Ali Mazaheri<sup>4</sup>, and David  
4 A. Seminowicz<sup>2,3</sup>

5 <sup>1</sup> Program in Neuroscience, University of Maryland School of Medicine, Baltimore, MD, 21201

6 <sup>2</sup> Department of Neural and Pain Sciences, University of Maryland School of Dentistry, Baltimore, MD,  
7 21201

8 <sup>3</sup> Center to Advance Chronic Pain Research, University of Maryland Baltimore, Baltimore, MD, 21201

9 <sup>4</sup> School of Psychology, University of Birmingham, B15 2TT, United Kingdom.

10

11 Please address correspondences to:

12 David A. Seminowicz, PhD

13 Department of Neural & Pain Sciences

14 University of Maryland School of Dentistry

15 650 W. Baltimore Street, 8 South

16 Baltimore, MD 21201

17 ph. 410.706.3476

18 dseminowicz@umaryland.edu

19

20 Keywords: alpha, prolonged pain, EEG

21 Acknowledgements:

22 This work was funded by an investigator-initiated research grant from Purdue Pharma L.P. Patent  
23 pending (DAS, AM, AJF). The authors declare no other conflicts of interest.

## 24 **Abstract**

25 We have previously observed that the speed of pain-free, sensorimotor peak alpha frequency (PAF) can  
26 predict a healthy individual's sensitivity to prolonged pain. Here we test the reliability and specificity of  
27 pain-free, sensorimotor PAF's relationship to prolonged pain sensitivity. We collected PAF at two visits  
28 ( $n = 61$  and  $46$  for visits 1 and 2, respectively), separated on average by eight weeks, where participants  
29 completed a series of thermal tests. Included were two tests of prolonged pain, Phasic Heat Pain and  
30 Capsaicin Heat Pain, and two acute tests, warmth and heat detection thresholds. We demonstrate that  
31 PAF predicts sensitivity to both prolonged pain tests but not to either acute test. Furthermore, we show  
32 that this prediction occurs at both short (minute) and long (week) timescales. These results s that pain-  
33 free, sensorimotor PAF is a reliable biomarker of prolonged pain sensitivity with potential for  
34 prospectively identifying pain sensitivity in the clinic.

## 35 **Introduction**

36 Chronic pain is a debilitating condition with cognitive, affective, and sensory symptoms that afflicts  
37 nearly one fifth of the American population (Kennedy et al., 2014), leading to treatment and work loss  
38 costs totaling nearly six hundred billion dollars annually (Gaskin & Richard, 2012). Identifying individuals  
39 who present at high risk for developing chronic pain is a crucial avenue for combatting chronic pain and  
40 its related economic burdens. At present, prediction of chronic pain development is poor: for example,  
41 one of the best predictors of persistent post-surgical pain is pain severity reported directly after surgery  
42 (e.g. Katz et al., 1996). While useful for case management after surgery, these measures cannot be used  
43 to identify, and target prophylactic treatments to, individuals at high risk for developing chronic pain.  
44 Biomarkers that predict the amount pain an individual will experience in response to a noxious event  
45 thus have important clinical potential.

46 Recent findings indicate that Peak Alpha Frequency (PAF), often referred to as the frequency within the  
47 8-12 Hz range that displays maximal power, may represent one such marker for pain sensitivity. The  
48 alpha rhythm represents the predominant oscillatory activity in the EEG while an individual is quietly  
49 resting, and is chiefly observed in primary sensory cortices (e.g. vision, somatosensation, audition).  
50 Although previously considered a signature of cortical "idling", significant evidence now suggests that  
51 alpha-related processes play a top-down role in gating information transfer across neural ensembles by  
52 coordinating cycles of excitation and inhibition (Jensen & Mazaheri, 2010). PAF can be viewed as  
53 reflecting the speed of these cycles (Mierau et al., 2017; Van Rullen, 2016) and has been shown to  
54 modulate the rate of sampling in multiple sensory domains (e.g. Samaha & Postle, 2015). PAF is a  
55 heritable trait that varies considerably between individuals (Bazanov & Vernon, 2014) and this  
56 variability has been suggested to contribute to individual differences in multiple psychological and  
57 physiological processes (e.g. Klimesch, 2012; Haegens et al., 2014), including those associated with pain.

58 A number of studies have reported abnormally slow PAF in patients with chronic pain (e.g. Sarnthein et  
59 al., 2006), and PAF slowing has long been hypothesized to reflect a pathological process involved in the  
60 chronification of pain (Llinás et al., 1999). Recent work from our lab, however, has demonstrated that  
61 this slowing may also reflect pain processes not directly tied to the presence of chronic pain. We  
62 reported that sensorimotor PAF collected from healthy individuals in the absence of pain could predict  
63 the intensity of a prolonged pain experience occurring either 45 minutes (Furman et al., 2018) or 4 to 6  
64 days (Seminowicz et al., 2018) in the future. In both cases, PAF recorded during a baseline, pain-free  
65 state was negatively associated with pain intensity; that is, individuals with slower sensorimotor PAF

66 went on to experience more pain than those with relatively faster sensorimotor PAF. These findings  
67 have led us to hypothesize that PAF is a biomarker for prolonged pain sensitivity in healthy individuals.  
68 Such an interpretation is not necessarily at odds with findings of PAF slowing in chronic pain patients  
69 given that heightened pain sensitivity is a relevant risk factor in determining chronic pain vulnerability  
70 (Diatchenko et al., 2005).

71 While our earlier work has provided preliminary evidence that PAF can serve as a marker of pain  
72 sensitivity, a number of questions remain to be answered in order to better evaluate the hypothesis that  
73 PAF is a reliable biomarker of prolonged pain sensitivity. First, it is unknown whether sensitivity to the  
74 types of prolonged pain paradigms we have previously employed is itself a reliable estimate of individual  
75 differences in pain processing. Establishing that sensitivity to prolonged pain events is a trait-like  
76 characteristic is a necessary precursor to any argument that PAF is a biomarker of pain sensitivity.  
77 Second, it is unknown whether PAF can provide predictions about pain sensitivity at multiple time points  
78 or whether it is limited to a single point in time. Demonstrating that PAF can provide cogent predictions  
79 about pain sensitivity at multiple time points would strongly reinforce the notion that PAF is a biomarker  
80 of pain sensitivity per se. Finally, it is unclear whether PAF shares a relationship with all types of pain  
81 events, with a particular type of pain event (i.e. prolonged pain), or whether it has multiple, distinct  
82 relationships depending on the type of pain event. For example, separate studies have suggested that  
83 PAF has opposite relationships to phasic and prolonged pain sensitivity (Furman et al., 2018; Nir et al.,  
84 2010).

85 In the current study, we collected pain-free, sensorimotor PAF and recorded pain responses to a series  
86 of thermal sensory tests. These thermal tests varied in their duration and noxious content, so that  
87 participants were exposed to a short, innocuous event, warmth detection thresholds, a short, pain  
88 event, heat pain thresholds, as well as two prolonged, pain events, Phasic Heat Pain (PHP) and Capsaicin  
89 Heat Pain (CHP), that are known to produce sensitization. This battery of tests allowed us to begin  
90 examining whether PAF is specifically related to tests of prolonged thermal pain, to any painful thermal  
91 test, or to any test involving thermal stimuli whether they are painful or not. For example, by including a  
92 second type of prolonged pain, PHP, we were able to determine whether PAF is related to multiple  
93 prolonged pain events or just CHP specifically.

94 In addition, most participants came back for a second, identical testing visit occurring an average of  
95 seven weeks later. By having participants complete multiple testing sessions, we were able to directly  
96 test two key predictions of the PAF pain sensitivity biomarker hypothesis; namely, that prolonged pain  
97 sensitivity is itself a trait-like quality and, furthermore, that PAF can predict pain sensitivity at more than  
98 one time point. In accord with these predictions, we present novel data demonstrating that prolonged-  
99 pain sensitivity is stable across two testing sessions, that PAF is related to two types of prolonged pain,  
100 and that this relationship remains stable within and across both testing visits.

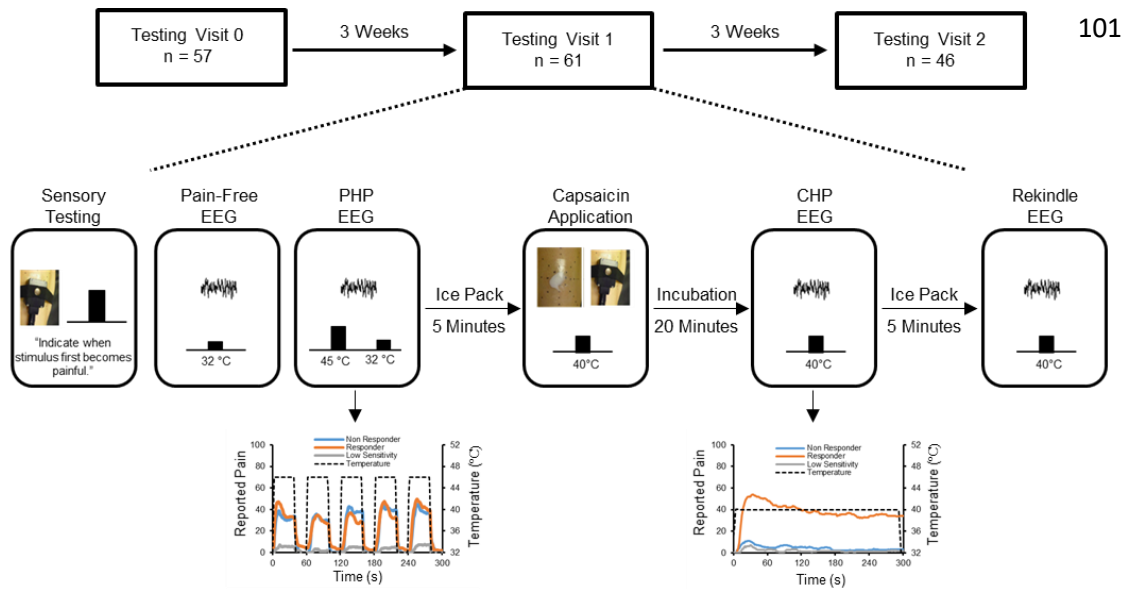

## 102 Materials and methods

### 103 Participants

104 Sixty-one pain-free, neurotypical adult participants (31 males, mean age = 27.82, age range = 21-42)  
105 took part in the experiment between 7/6/2016 and 10/20/2017. This study was approved by the  
106 University of Maryland, Baltimore Institutional Review Board, and informed written consent was  
107 obtained from each participant prior to any study procedures. The study was pre-registered on  
108 ClinicalTrials.gov (NCT02796625).

109 Table 1 provides information regarding how many participants contributed data to each analysis.

### 110 Procedure

111 An outline of the experimental timeline and procedures is presented in Figure 1. In order to allow  
112 sufficient time for any long-term effects of capsaicin administration to subside, all visits were separated  
113 by a minimum of 21 days (one subject returned at 19 days because of a scheduling conflict; mean  
114 separation of Visit 1 and Visit 2 = 54.74 days, S.D. = 55.92 days, range = 19 – 310 days, Figure S1).

115 Participants first completed an introductory Visit 0 (V0) session during which they first underwent a brief  
116 a brief sensory testing session in which they were asked to report when they felt a change in  
117 temperature (for warmth (WDT) and cool detection threshold (CDT)) or when the temperature first  
118 became painful (heat pain threshold (HPT) and cold pain threshold (CPT)). Three trials were presented  
119 for each test. Also occurring at V0 were Ice Pack tests to ensure that 40°C was rated as non-painful, to identify

|                        | Visit 1             |                         |                     | Visit 2             |                         |                     |
|------------------------|---------------------|-------------------------|---------------------|---------------------|-------------------------|---------------------|
|                        | Capsaicin Responder | Capsaicin Non-Responder | High Pain Tolerance | Capsaicin Responder | Capsaicin Non-Responder | High Pain Tolerance |
| Total Participants     | 35 (19 Female)      | 15 (6 Female)           | 11 (5 Female)       | 27 (14 Female)      | 11 (4 Female)           | 8 (3 Female)        |
| Exclusions             |                     |                         |                     |                     |                         |                     |
| EEG Technical Error    | 1 (Female)          | 0                       | 0                   | 0                   | 0                       | 0                   |
| Abnormal Pain Ratings  | 1 (Female)          | 0                       | 1 (Male)            | 1 (Female)          | 0                       | 1 (Male)            |
| Abnormal CHP Change    | 1 (Female)          | 0                       | 0                   | 1 (Female)          | 0                       | 0                   |
| Participants Remaining | 32 (16 Female)      | 15 (6 Female)           | 10 (5 Female)       | 25 (12 Female)      | 11 (4 Female)           | 7 (3 Female)        |

Table 1. Summary of exclusions and participants contributing data at each testing visit.

120  
121  
122  
123  
124

the temperature for the Phasic Heat Pain (PHP) stimulus, and to provide initial exposure to the Capsaicin Heat Pain (CHP) model. For all V0 testing, participants were seated in a comfortable chair and EEG was not recorded. For the first four participants, the V0 session was not performed and these procedures, excluding CHP exposure, were performed immediately prior to the V1 session procedures.

125  
126  
127  
128  
129  
130  
131  
132  
133  
134  
135

A minimum of three weeks after completion of V0, participants returned for Testing Visit 1 (V1). The majority of participants then returned at least three weeks after V1 for Testing Visit 2 (V2). Procedures for the V1 and V2 testing sessions were identical. For the entirety of each testing session, participants were seated in a comfortable chair in a quiet room that was isolated from strong electrical interference. For all sessions in which EEG was recorded, lights in the testing room were turned off and participants were instructed to close their eyes, remain still, relax without falling asleep, and continuously rate any pain they experienced with a manual analog scale placed at their right hand. Testing sessions began with measurement of each participant's WDT, CDT, HPT, and CPT. For the first four participants, this sensory testing was not performed at the V2 sessions. After this brief sensory testing session, the lights in the testing room were turned off and EEG was recorded during a pain-free resting state for a total of five minutes.

136  
137  
138  
139  
140  
141  
142  
143  
144  
145

Immediately following the pain-free resting state EEG recording, participants were informed that the PHP model would begin. Once the participants acknowledged that they were ready to begin, the PHP model, described below, began. Continuous EEG was recorded during this PHP resting state for a total of five minutes. Upon completion of the PHP resting state, the lights in the testing room were turned on and a disposable ice pack was placed onto the left forearm. The icepack was left in place until the participant reported a complete absence of pain at the site where the thermode had been applied. The icepack was then removed, and the participant was asked again if any pain was present, with procedures continuing only when pain was reported to be absent. The lights in the testing room were then turned off and five minutes of continuous EEG was collected for this return to baseline resting state session (not included in current analyses).

146  
147  
148  
149  
150  
151

After finishing the return to baseline resting state EEG recording, the lights in the testing room were turned on, and administration of the CHP model began. We followed the procedures described in our previous publication with only a slight modification to the incubation period (Furman 2018). In brief, capsaicin was applied to the participant's left forearm and a 40°C thermode was placed directly on top of the capsaicin application for a total of twenty minutes. Participants were instructed to continuously rate their pain during the incubation period.

152  
153

Following the 20-minute incubation period, the lights in the testing room were turned off and participants were informed that the prolonged pain model would begin. Once the participants

154 acknowledged that they were ready to begin, the thermode temperature was again increased to 40°C  
155 and 5 minutes of continuous EEG was recorded for the CHP resting state session. A second return to  
156 baseline resting state session (not included in current analyses), identical to the one that occurred after  
157 the PHP resting state session, was then performed. Finally, a 40°C stimulus was re-applied over the  
158 capsaicin and five minutes of eyes closed, continuous EEG was recorded for the “rekindle” resting state  
159 session (not included in current analyses).

#### 160 *EEG*

161 Scalp EEG was collected from an EEG cap housing a 63 channel BrainVision actiCAP system (Brain  
162 Products GmbH, Munich, Germany) labeled according to an extended international 10–20 system  
163 (Oostenveld and Praamstra, 2001). All electrodes were referenced online to the average across all  
164 recording sensors and a common ground set at the AFz site. Electrode impedances were maintained  
165 below 5 kΩ throughout the experiment. Brain activity was continuously recorded within a 0.01–100 Hz  
166 bandpass filter, and with a digital sampling rate of 500 Hz. The EEG signal was amplified and digitized  
167 using an actiCHamp DC amplifier (Brain Products GmbH, Munich, Germany) linked to BrainVision  
168 Recorder software (version 2.1, Brain Products GmbH, Munich, Germany).

#### 169 *Thermal Stimulator and Pain Scale*

170 Thermal stimuli were delivered to the volar surface of the participant's left forearm using a thermal-  
171 contact heat stimulator (27mm diameter Medoc Pathway CHEPS Peltier device; Medoc Advanced  
172 Medical Systems Ltd., Ramat Yishai, Israel).

173 Pain ratings were collected continuously with a manual analog scale consisting of a single sliding tab  
174 (Medoc Advanced Medical Systems Ltd., Ramat Yishai, Israel). Prior to testing, participants were  
175 instructed that the lower and upper bounds of the scale represented no pain and the most pain  
176 imaginable, respectively, and that they should continuously update the slider to indicate how much pain  
177 they were experiencing at the current moment in time. Care was taken by experimenters to avoid  
178 providing numerical anchors when describing the scale and no additional landmarks were physically  
179 present on the scale. Prior to testing, participants were given an opportunity to practice using the analog  
180 device with both their eyes open and closed. During testing, participants were permitted to briefly open  
181 their eyes while rating.

#### 182 *Cool and Warmth Detection Thresholds (CDT, WDT) and Cold and Heat Pain Thresholds (CPT, HPT)*

183 Tests were always administered in the following order: WDT, CDT, HPT, and finally CPT. Prior to each  
184 test, participants were instructed on the required response criteria (i.e. for HPT: you will be presented  
185 with an increasingly hot temperature on your forearm, please indicate when the temperature first  
186 becomes painful). Participants provided feedback by clicking either the left or right button of a  
187 computer mouse placed in their right hand.

188 A total of three trials were presented for each test with an ISI of 4-6 seconds (randomly determined on a  
189 per trial basis). For all tests, temperatures were applied with a rise rate of 1°C/second and return rate of  
190 2°C/second (initiated on any mouse click). All threshold testing was performed on the volar surface of  
191 the left forearm. Prior to testing, the distance from the wrist to elbow joint was measured and the  
192 forearm was then divided into three equal length zones. For each test, the first trial was administered to

193 the zone closest to the wrist, the second trial administered to the middle forearm zone, and the third  
194 trial administered to the zone closest to the elbow.

#### 195 *Phasic Heat Pain (PHP) Model*

196 Temperatures used during the PHP model were determined at the V0 visit or, for the first four  
197 participants, during V1 sensory testing. During these sessions, participants were exposed to a series of  
198 12, 20 second trials in which a single temperature (2.5 second rise and fall) was applied and then asked  
199 to provide an average pain rating at the conclusion of each trial. Temperatures ranged from 37 to 48°C  
200 (intervals of 2°C, starting as if 37°C was 38°C) and each temperature was presented twice in a pseudo-  
201 random order. Trials were separated by 10 seconds and after each trial the thermode was moved to a  
202 neighboring forearm zone in order to minimize sensitization. From these trials, the temperature that  
203 most closely evoked an average pain rating of 5/10 was selected. This level of pain was targeted in order  
204 to best match the amount of pain evoked by the CHP model (Furman et al., 2018).

205 The PHP model consisted of a series of five consecutive stimulus trains each lasting one minute in total.  
206 Within each train, the PHP stimulus was applied for 40 seconds (rise and fall times of 2s) followed by a  
207 neutral skin temperature stimulus (32°C) applied for 20 seconds. PHP scores were calculated by  
208 averaging ratings during the five, forty second periods in which the PHP stimulus was present. Previous  
209 studies using similar durations of stimulation have reported that this procedure results in sensitization  
210 of pain ratings in healthy participants (e.g. Granot et al., 2006).

#### 211 *Capsaicin Heat Pain (CHP) Model*

212 CHP procedures were similar to the one used in our prior study (Furman et al., 2018). The CHP model  
213 lasts for hours to days and recapitulates some cardinal sensory aspects of chronic neuropathic pain (Culp  
214 et al., 1989; LaMotte RH, et al., 1992; Baron 2009; Lötsch et al., 2015). In brief, we applied ~1 g 10%  
215 capsaicin paste (Professional Arts Pharmacy, Baltimore, MD) topically to the volar surface of the left  
216 forearm, fixing it in place with a Tegaderm bandage. A thermode was then placed over top of the  
217 capsaicin application. This procedure does not cause lasting tissue damage (Moritz and Henriques,  
218 1947). CHP scores were generated by averaging ratings across the entire five-minute session that  
219 followed incubation.

220 To restrict analyses to those individuals with clear capsaicin responses, we classified participants based  
221 on their pain scores. Previous work has found that CHP evokes no pain or hypersensitivity in roughly one  
222 third of individuals (Liu et al., 1998, Walls et al., 2017). The reasons for this remain unclear, making it  
223 difficult to determine whether low levels of pain in response to CHP model are due to a failure of the  
224 model or lower pain sensitivity in those individuals. To address this problem, we only include  
225 participants in the full analysis if they meet one of the two following conditions: 1) average pain greater  
226 than 10 out of 100 in response to the CHP paradigm at either V1 or V2 (“CHP responder”), or, 2) average  
227 reported pain at V1 less than 10 out of 100 in response to both the CHP and PHP paradigms (“high  
228 tolerance individuals”). Given their tolerance of the PHP model, we interpret the low CHP response of  
229 this latter group as truly reflecting low pain sensitivity. In order to provide a more complete picture of  
230 the PHP data, we also present data from those individuals with no or very weak capsaicin responses  
231 (average CHP response at both visits < 10, “CHP non-responders”) when direct comparisons to  
232 prolonged pain data are not made.

233 We excluded one participant who experienced a change in CHP score, + 69.26, that was 3.82 standard  
234 deviations greater than the average CHP change (average change = 1.76, S.D. = 17.64). No other change  
235 in CHP scores was greater than 2.05 standard deviations above the mean (range = +37.96 to -31.05).

### 236 *Data Processing*

237 Pain ratings were collected from the manual analog scale at a rate of 1000 Hz. Manual analog scale data  
238 was transformed by converting the horizontal position of the slider into a continuous value between 0  
239 and 100. Pain ratings were aligned to the EEG recording through a parallel port connecting the rating  
240 device and EEG acquisition computer.

241 The EEG data of interest were the pain-free resting state EEG sessions collected during V1 and V2  
242 sessions. Initial processing of EEG data was performed using EEGLAB 13.6.5b (Delorme and Makeig,  
243 2004). Processing began with filtering the data between 2 and 100Hz using a linear FIR filter. Channel  
244 data were then visually inspected and overtly noisy channels were removed from further analysis.  
245 Removed channels were not interpolated. On average, 1.64 (S.D. = 1.92, range: 0 – 8) and 1.79 (S.D. =  
246 1.79, range: 0 – 6) channels were removed per individual from V1 and V2 datasets, respectively.

247 As opposed to our previous studies which used ICA to identify sensorimotor PAF, we used channel level  
248 data to increase the ease of reproducibility of the methods. This approach, while decreasing the signal  
249 to noise of the data, eliminates the need to identify ICA components on a participant by participant  
250 basis. For channel level analyses, we focused on channels that most strongly contributed to the  
251 sensorimotor component from our first study on sensorimotor PAF (Furman et al., 2018). Thus, the  
252 sensorimotor ROI included the C3, Cz, and C4 channels. In the event that a channel was removed due to  
253 noise, the remaining sensors were used; this affected only a few participants (V1: n = 4; V2: n = 1), and  
254 no participant had more than one sensor removed that belong to this ROI.

### 255 *Quantification of Sensorimotor PAF*

256 The frequency decomposition of the sensorimotor ROI data was performed using routines in FieldTrip  
257 (Oostenveld et al., 2011). The data for each resting state session was segmented into 5-s epochs and  
258 power spectral density in the 2–50 Hz range was derived for each epoch in 0.2 Hz bins using the  
259 'ft\_freqanalysis\_mtmfft' function. A Hanning taper was applied to the data prior to calculating the  
260 spectra to reduce any edge artifacts (e.g. Mazaheri et al., 2014).

261 PAF for each 5 second epoch at every sensor was estimated using a center of gravity (CoG) method  
262 (Klimesch et al., 1993). We defined CoG as follows:

$$263 \quad CoG = \frac{\sum_{i=1}^n f_i * a_i}{\sum_{i=1}^n a_i}$$

264 where  $f_i$  is the  $i$ th frequency bin including and above 9 Hz,  $n$  is the number of frequency bins between 9  
265 and 11 Hz, and  $a_i$  the spectral amplitude for  $f_i$ . From our previous work, we have determined that this  
266 narrow analysis band reduces the influence of  $1/f$  EEG noise on the estimation of PAF (Furman et al.,  
267 2018). PAF was estimated for every 5 second epoch and then averaged to yield a single mean PAF  
268 estimate for each sensor. Average PAF estimates for sensorimotor ROI sensors were further averaged to  
269 yield a grand mean sensorimotor PAF estimate for each participant at each visit.



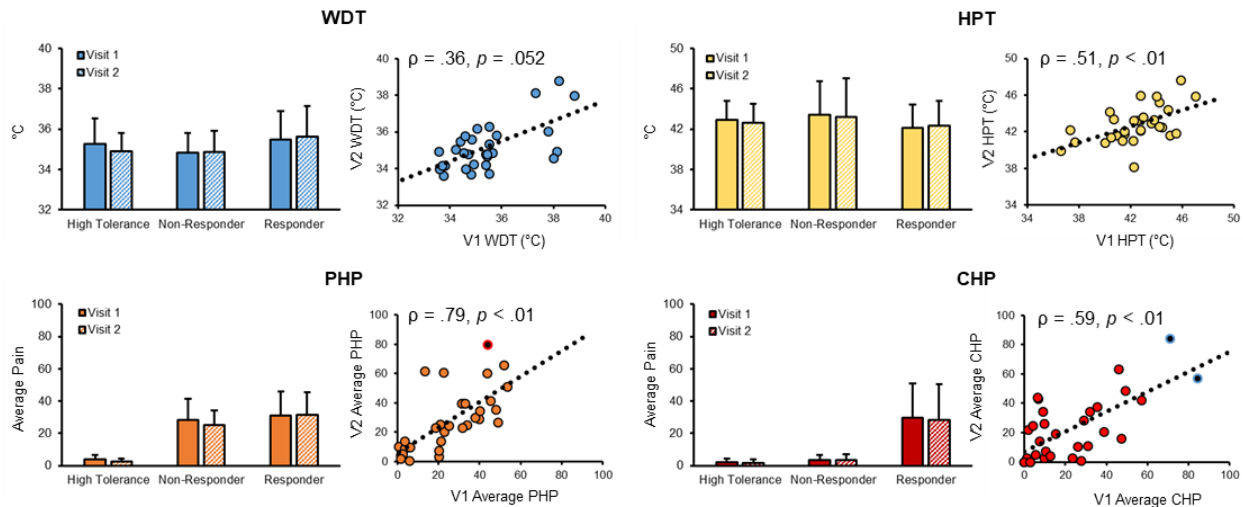

Figure 2. Sensory scores were stable across visits for all pain classifications. Pain ratings (mean + 1 S.D.) broken down by sensory test, pain classification, and visit. Scatter plots only include data from CHP-responders and high tolerance individuals. Off-color data points represent statistical outliers not included in analyses and dotted lines represent the linear regression line of best fit.

## 270 Statistical Analysis

271 All analyses were performed using custom scripts implemented in the Matlab environment (version  
272 R2013A). Statistical tests were conducted in Matlab or SPSS (Version 25).

273 We first investigated whether estimates of WDT, HPT, PHP, and CHP are reliable over time, and as such  
274 reflect reliable estimates of individual differences in thermal heat sensory processing. Sensory tests  
275 were compared using a linear mixed effects model with subjects as random effects (intercept included)  
276 and Visit (V1 vs V2), Type (WDT vs. HPT vs. Phasic vs. CHP), and the Visit X Type interaction as fixed  
277 effects. We were specifically interested in determining whether scores change over time (main effect of  
278 Visit) and whether these changes were specific to particular tests (Visit X Type interaction). In cases  
279 where we needed to determine whether the null hypothesis could be accepted (i.e. no change in scores  
280 between visits), we used Bayes factor analysis. Bayes factor analysis provides a method for assessing the  
281 relative evidence in favor of either the null or alternative hypothesis. A Bayes factor less than .33 or  
282 greater than 3 are taken as strong evidence in favor of the null and alternative hypotheses, respectively;  
283 Bayes factor scores in-between these values are considered to provide no evidence in favor of either  
284 hypothesis. Additionally, the stability of sensory tests was analyzed by correlating scores at V1 and V2  
285 for each sensory test. For these and all correlational analyses, Spearman's rank order correlations were  
286 used and outliers were identified as data points 2.5 standard deviations greater than the mean based on  
287 values obtained from V1 data. Finally, to assess the relationship of scores across testing type, we  
288 performed a series of pair-wise correlations between all possible pairs of sensory tests. Corrections for  
289 the 6 total tests were made according to the Bonferroni method, yielding a significance threshold of  $p =$   
290 .008.

291 Similarly, we determined whether pain-free, sensorimotor PAF was reliable across the two testing visits.  
292 This was accomplished by comparing V1 and V2 estimates of pain-free, sensorimotor PAF using a paired  
293 t-test and by correlating estimates at each visit with one another. Finally, to determine whether the null  
294 hypothesis could be accepted (i.e. no change in PAF between visits), we used Bayes factor analysis.

|     | Visit 1 |           |          |            | Visit 2    |           |           |     |             |
|-----|---------|-----------|----------|------------|------------|-----------|-----------|-----|-------------|
|     | WDT     | HPT       | PHP      | CHP        | CHP        | PHP       | HPT       | WDT |             |
| WDT |         | 0.22(.16) | .11(.48) | -.10(.48)  | .14(.46)   | .20(.29)  | 0.23(.22) |     | WDT         |
| HPT |         |           | .05(.75) | -.29(.06)  | -.40(.03)  | -.29(.06) |           |     | HPT         |
| PHP |         |           |          | .52(<.008) | .77(<.008) |           |           |     | Phasic Pain |
| CHP |         |           |          |            |            |           |           |     | CHP         |

Table 2. Spearman correlation coefficients (*p* values) between sensory tests at each testing visit. Cells highlighted in red denote significant correlations after correction for multiple comparisons.

295 In order to identify how pain-free, sensorimotor PAF is related to our sensory tests, we performed a  
 296 series of pairwise correlations between sensorimotor PAF and each sensory test. Corrections for  
 297 multiple tests at each visit (4 tests; one per sensory test) were made according to the Bonferonni  
 298 method, yielding a significance threshold of  $p = .0125$ .

299 Finally, we median-split our data according to V1 estimates of sensorimotor PAF to yield “slow” and  
 300 “fast” PAF groups. Sensory test scores were then compared using separate linear mixed effects model  
 301 with subjects as random effects (intercept included) and Visit (V1 vs. V2), PAF Speed (Slow vs. Fast), and  
 302 the Visit X Speed interaction as fixed effects.

### 303 Results

304 From our initial cohort of 61 individuals, two individuals were removed due to abnormal pain ratings:  
 305 one participant fell asleep during ratings while another participant provided abnormally high pain  
 306 ratings in the absence of any noxious stimuli suggesting that they may have been confused by the rating  
 307 scheme. One additional participant was removed due to an extreme change in CHP score at V2.

308 From the remaining 58 participants (Table 1), 33 participants were classified as CHP responders (average  
 309 CHP > 10), 10 participants were classified as high tolerance individuals (average CHP and PHP < 10), and  
 310 14 participants were classified as CHP non-responders (only average CHP < 10). Due to a technical error,  
 311 EEG data was lost for one CHP responder at V1; V1 data for this individual was only included in sensory  
 312 test analyses. Of the 58 individuals providing data at V1, a total of 43 individuals provided data at Visit 2,  
 313 of which 32 had been classified as capsaicin responders or high tolerance individuals at V1. In total, 31 of  
 314 these participants provided complete V1 and V2 datasets.

315 A summary of average sensory test scores for each pain classification is presented in Figure 2.  
 316 Additionally, the average V1 PHP and CHP time courses for all three pain classifications are presented in  
 317 Figure 1; data from V2 were qualitatively similar (data not shown). In line with what has been previously  
 318 reported, both PHP and CHP produced sensitization (see Supplemental Data).

319 In order to determine whether pain levels were stable over time, we submitted sensory test scores from  
 320 CHP responders and high tolerance individuals to a linear mixed effects model with participants as  
 321 random effects and Visit (V1 vs. V2), Type (WDT vs. HPT vs. Phasic vs. CHP), and the Visit X Type  
 322 interaction as fixed effects. The absence of a significant main effect of Visit,  $F_{(1,128.30)} = .33, p = .57$ , or  
 323 Visit x Pain Type interaction,  $F_{(3,69.62)} = .83, p = .48$ , indicates that sensory test scores were generally  
 324 stable over time. Bayes factor analysis (Rouder et al., 2009) supported the null hypothesis that V1 and

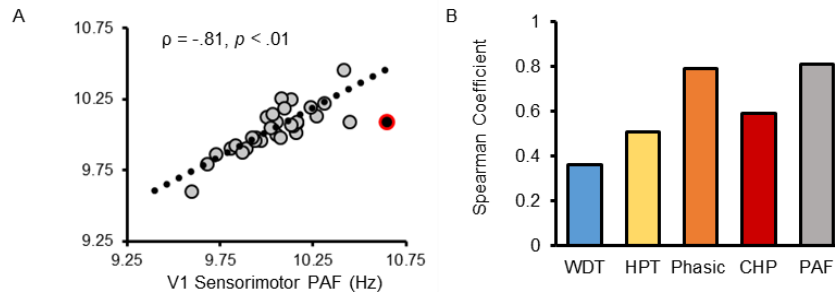

Figure 3. A. Pain-free, sensorimotor PAF estimates are strongly correlated across Visits. Scatter plot only includes data from CHP responders and high tolerance individuals. Off-color data points represent statistical outliers not included in analyses and dotted lines represent the linear regression line of best fit. B. PAF and sensory tests are stable across Visits. Prolonged pain paradigms are the most stable sensory tests while sensorimotor PAF is the most stable of our metrics.

325 V2 scores were the same for WDT (Bayes Factor = .10) and HPT (Bayes Factor = .19) but were insensitive  
326 with respect to PHP (Bayes Factor = 1.12) and CHP (Bayes Factor = .71)

327

328 As another demonstration of stability, scores at V1 and V2 were significantly correlated for HPT,  $\rho = .51$ ,  
329  $p < .01$ , PHP,  $\rho = .79$ ,  $p < .01$ , and CHP:  $\rho = .59$ ,  $p < .01$  (Figure 2). WDT scores at V1 and V2 trended  
330 towards significance,  $\rho = .36$ ,  $p = .052$ . When we expanded the dataset to also include CHP non-  
331 responders, the correlations for all sensory tests became significant (WDT:  $\rho = .42$ ,  $p < .01$ ; HPT:  $\rho = .61$ ,  
332  $p < .01$ ; PHP:  $\rho = .74$ ,  $p < .01$ ; CHP:  $\rho = .69$ ,  $p < .01$ ). Surprisingly, scores for the CHP and PHP paradigm  
333 were qualitatively more reliable than either WDT or HPT (Fig 3B). Despite the ubiquity of WDT and HPT  
334 in pain research, this finding suggests that our CHP and PHP paradigms may be equally capable at  
335 capturing variability in pain sensitivity. Above all else, these results demonstrate that sensory scores  
336 from each test are stable over time and that prolonged pain sensitivity is a trait-like characteristic within  
337 our sample.

338 Finally, we investigated inter-test relationships by performing correlations between all possible pairs of  
339 sensory tests (Table 2). The only sensory tests that were significantly correlated were CHP and PHP. This  
340 finding suggests that CHP and PHP sample the same form of sensitivity, prolonged pain sensitivity, and  
341 that other tests are largely distinct from one another, thereby allowing us to determine whether PAF has  
342 different relationships with different types of thermal sensitivity.

343 *Sensorimotor PAF is Stable over Time*

344 Given the stability of sensory tests, we expected that sensorimotor PAF should be equally stable if it is  
345 indeed a reliable predictor of pain sensitivity. Two observations strongly suggest that sensorimotor PAF  
346 was stable across the 7-week (on average, Figure S1) period separating V1 and V2. First, a paired t-test  
347 found no significant difference between V1 (mean = 10.04, S.D. = .20) and V2 (mean = 10.04, S.D. = .16)  
348 estimates of Sensorimotor PAF,  $t_{(29)} = .32$ ,  $p = .75$ , and Bayes factor analysis showed that our findings  
349 supported the null hypothesis that there are no differences between PAF estimates at V1 and V2 (Bayes  
350 Factor < .01). These results did not change when we included all participants regardless of pain  
351 classification  $t_{(40)} = .34$ ,  $p = .73$ , Bayes Factor < .01. Second, V1 and V2 sensorimotor PAF were strongly  
352 correlated, Spearman  $\rho = .81$ ,  $p < .01$  (Figure 3A). Inclusion of all participants regardless of pain  
353 classification did not change the magnitude of this relationship, Spearman  $\rho = .82$ ,  $p < .01$ . These results  
354 clearly demonstrate that sensorimotor PAF is highly stable over time, indeed the most stable measure  
355 recorded in this study (Fig 3B), and thus represents a reliable individual trait characteristic.

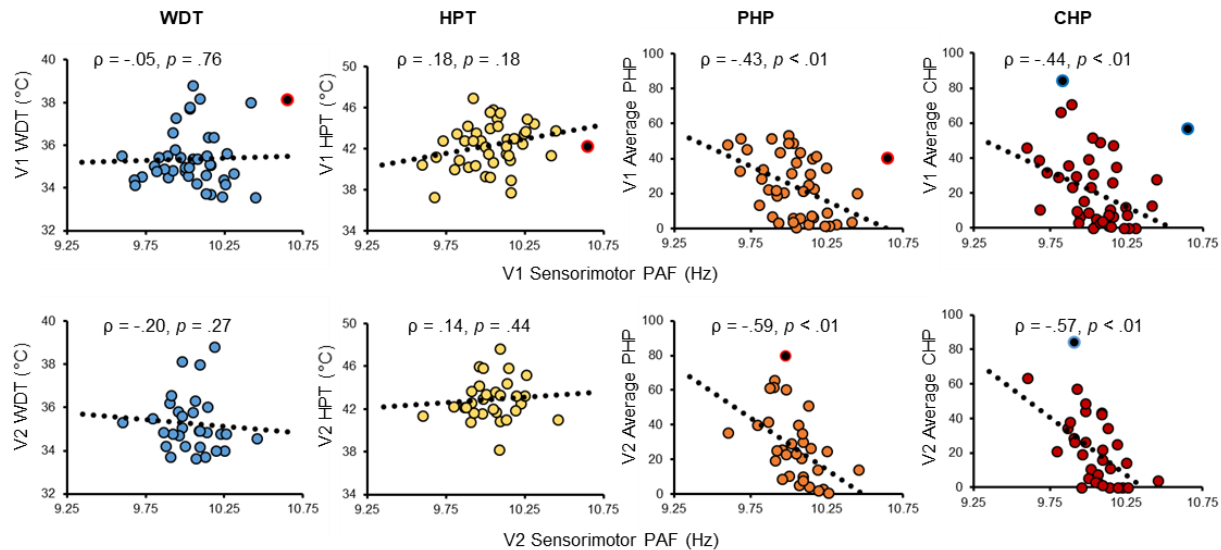

Figure 4. Phasic Pain and CHP are the only sensory tests showing significant correlations to pain-free Sensorimotor PAF at both testing visits. Scatter plots only include data from CHP-responders and high tolerance individuals. Off-color data points represent statistical outliers not included in analyses and dotted lines represent the linear regression line of best fit.

### 356 *Sensorimotor PAF Specifically and Reliably Predicts Thermal Prolonged Pain Paradigms*

357 We next performed a series of correlations to determine which sensory tests are related to  
358 sensorimotor PAF. Specifically, we were interested in replicating our previous finding that pain-free,  
359 sensorimotor PAF is related to CHP scores and also determining whether PAF would share a similar a  
360 relationship with a second prolonged pain test, PHP. At V1, significant relationships emerged between  
361 pain-free, sensorimotor PAF and both prolonged pain paradigms, PHP: Spearman  $\rho = -.43, p < .01$ ; CHP:  
362 Spearman  $\rho = -.44, p < .01$  (Figure 4). Similar results were obtained for PHP when we either used a  
363 partial correlation to account for the thermode temperature used during PHP, Spearman  $\rho = -.40, p =$   
364  $.01$ , or included all participants regardless of pain classification, Spearman  $\rho = -.34, p = .01$ ; the former  
365 result suggests the relationship between PAF and PHP is not a function of stimulus intensity but instead  
366 how sensitive the individual is to the stimulus. In comparison, we could not identify a significant  
367 relationship between pain-free, sensorimotor PAF and either WDT, Spearman  $\rho = -.05, p = .76$ , or HPT,  
368 Spearman  $\rho = .25, p = .11$ . These results did not change when we expanded our analyses to include all  
369 participants regardless of pain classification, WDT: Spearman  $\rho = .06, p = .66$ ; HPT: Spearman  $\rho = .18, p =$   
370  $.18$ . Importantly, we could not find any evidence of sex effects in the relationship of PAF to either PHP or  
371 CHP (Figure S3A). Inspection of the sensor level correlation distributions, the distribution of correlations  
372 between sensory test scores and PAF calculated at each individual sensor, clearly demonstrates the  
373 robustness of these results (Figure S4A).

374 An identical analysis performed on V2 data similarly revealed a significant relationship between pain-  
375 free, sensorimotor PAF and both prolonged pain paradigms, PHP: Spearman  $\rho = -.59, p < .01$ ; CHP:  
376 Spearman  $\rho = -.57, p < .01$  (Figure 4); PHP outcomes remained stable when either accounting for  
377 thermode temperature with a partial correlation, Spearman  $\rho = -.55, p < .01$ , or including all participants  
378 regardless of pain classification, Spearman  $\rho = -.37, p = .02$ . Similarly, we were unable to identify a  
379 significant relationship between pain-free, sensorimotor PAF and WDT or HPT, WDT: Spearman  $\rho = -.20,$   
380  $p = .27$ ; HPT: Spearman  $\rho = .14, p = .44$ . These results did not change when we considered all  
381 participants regardless of pain classification, WDT: Spearman  $\rho = -.16, p = .31$ ; HPT: Spearman  $\rho = .03, p$

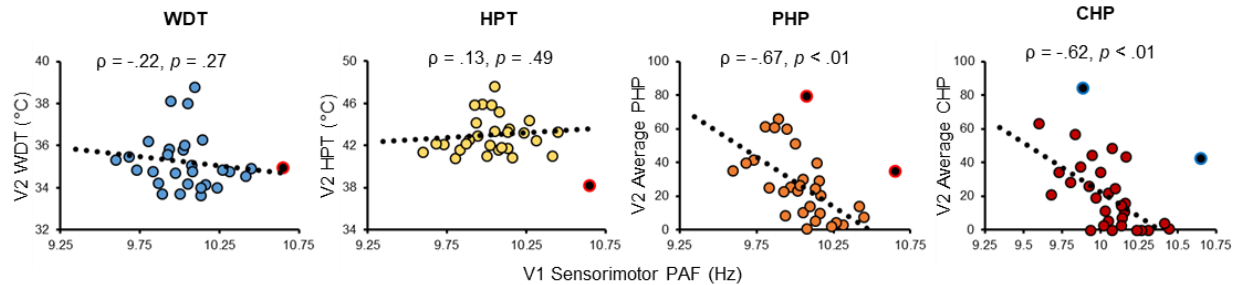

Figure 5. Pain-free, sensorimotor PAF at V1 is a significant predictor of Phasic Pain and C-HP scores occurring, on average, 7 weeks later at V2. Scatter plots only include data from CHP-responders and high tolerance individuals. Off-color data points represent statistical outliers not included in analyses and dotted lines represent the linear regression line of best fit.

382 = .85. As in V1, there did not appear to be an influence of sex on the relationship between PAF and  
383 either of our prolonged pain tests (Figure S4B). As before, sensor level distributions of PAF-sensory score  
384 correlations revealed that these findings were evident across the entire scalp (Figure S4B).

385 Finally, we determined whether V1 estimates of sensorimotor PAF could predict V2 sensory scores  
386 occurring, on average, 7 weeks later. Indeed, V1 pain-free, sensorimotor PAF was negatively related to  
387 both V2 PHP scores, Spearman  $\rho = -.67, p < .01$ , and V2 CHP scores, Spearman  $\rho = -.62, p < .01$  (Figure 5).  
388 This relationship between V1 pain-free, sensorimotor PAF and V2 PHP remained when we controlled for  
389 thermode temperature, Spearman  $\rho = -.66, p < .01$ , or included all participants regardless of pain  
390 classification, Spearman  $\rho = -.44, p < .01$ . In contrast, we could find no evidence of a relationship  
391 between V1 pain-free, sensorimotor PAF and either V2 WDT, Spearman  $\rho = -.22, p = .27$ , or V2 HPT,  
392 Spearman  $\rho = .13, p = .49$ ; these results did not change when we included all participants regardless of  
393 pain classification, WDT: Spearman  $\rho = -.14, p = .38$ ; HPT: Spearman  $\rho = .11, p = .49$ . This set of findings  
394 provide an important insight into the apparent stability of the PAF-prolonged pain relationship at both  
395 V1 and V2. Specifically, the strong relationship of V1 PAF to V2 pain scores suggest that, rather than the  
396 appearance of a *de novo* relationship at each time point, V2 correlations are a direct recapitulation of  
397 the relationship shared by PAF and prolonged pain scores at V1. In summary, these and the findings  
398 presented above suggest that sensorimotor PAF is a reliable predictor of prolonged pain sensitivity both  
399 within and across our two visits.

#### 400 “Slow” and “Fast” Sensorimotor PAF Individuals Experience Different Amounts of Prolonged Pain

401 In our previous work (Furman et al., 2018), we demonstrated there are differences in PAF speed  
402 between low and high pain sensitive groups. We now take the complementary approach to determine  
403 whether there are differences between “Slow” and “Fast” PAF individuals in their sensory test scores.  
404 To do so, we first performed a median split of our data based on PAF estimates obtained at V1 (labels  
405 were carried over to V2). This yielded 21 “Slow” (mean = 9.88 Hz, S.D. = .13) and 21 “Fast” (mean =  
406 10.21 Hz, S.D. = .15) PAF individuals at V1, and 14 “Slow” (mean = 9.87 Hz, S.D. = .13) and 17 “Fast”  
407 (mean = 10.21 Hz, S.D. = .16) individuals at V2.

408 Next, we performed four, separate linear mixed models, one for each sensory test, with subjects as  
409 random effects and Visit (V1 vs V2), Speed (Slow vs. Fast), and the Visit X Speed interaction as fixed  
410 effects. Average sensory test scores for each speed group at each visit can be seen in Figure 6. For PHP  
411 scores, this analysis revealed a significant main effect of Speed,  $F_{(1,37.42)} = 7.04, p = .01$ , but neither a  
412 significant main effect of Visit,  $F_{(1,29.61)} = 2.01, p = .17$ , nor a significant Visit X Speed interaction,  $F_{(1,29.61)} =$   
413  $.98, p = .33$ . According to this analysis, the estimated effect of PAF speed on PHP scores was 16.67 (95%

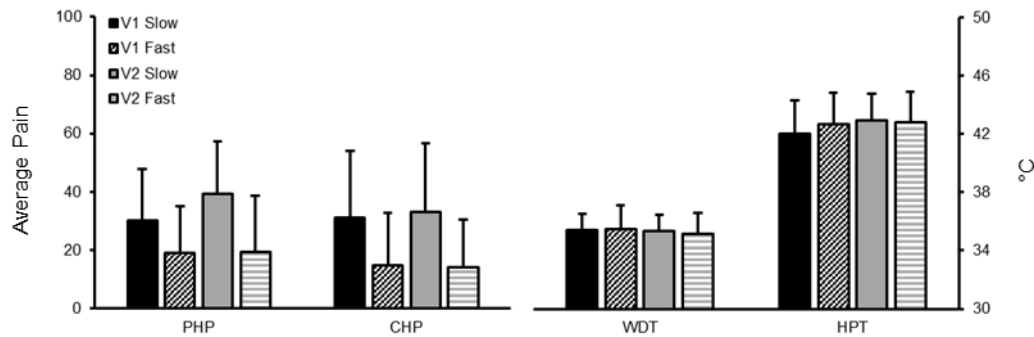

Figure 6. “Fast” and “Slow” PAF individuals vary only in the amount of average Phasic Pain and C-HP that they experience. Speed groups were generated by performing a median split on V1 sensorimotor PAF estimates. Bars reflect mean scores (+1 S.D.).

414 Confidence Intervals: 3.22 – 30.11). This difference emerged despite the fact that PHP thermode  
415 temperatures were nearly identical for the Slow PAF group (mean = 45.52°C, S.D. = 1.47°C) and Fast PAF  
416 group (mean = 46.23°C, S.D. = 1.34°C,  $t_{(40)} = 1.65$ ,  $p = .11$ ). Indeed, the fact that thermode temperatures  
417 were qualitatively higher for Fast PAF individuals suggests that we may, if anything, be underestimating  
418 the effect of PAF speed on pain sensitivity. The same pattern of results emerged for CHP scores with a  
419 significant main effect of Speed,  $F_{(1,39.96)} = 9.34$ ,  $p < .01$ , and without a significant main effect of Visit,  
420  $F_{(1,32.27)} = .05$ ,  $p = .83$ , or a significant Visit X Speed interaction,  $F_{(1,32.27)} = .23$ ,  $p = .64$ . The estimated effect  
421 of PAF speed on CHP scores was 19.13 (95% Confidence Intervals: 5.48 – 32.79). In contrast, we could  
422 not identify any significant main effects or interaction for either WDT (all  $p > .29$ ) or HPT (all  $p > .23$ ).

423 To determine whether these group differences were specific to particular portions of the prolonged pain  
424 tests or present across the entire test, we computed the average pain time course separately for each  
425 speed group on each prolonged pain test. This revealed differences between Slow PAF and Fast PAF  
426 groups that were evident across the entirety of the PHP and CHP paradigms (Figure 7); differences in  
427 pain ratings appeared almost immediately and persisted stably throughout testing without any apparent  
428 interaction between group and time. In line with this observation, we could find no evidence that “Slow”  
429 and “Fast” PAF groups differed in the amount of sensitization they experienced in the PHP Paradigm  
430 (Supplementary Data). This suggests that PAF’s impact on the pain experience is likely manifest in  
431 processes that organize an individual’s general, or “trait-like”, pain sensitivity rather than those  
432 processes that modify the amount of ongoing pain (i.e. sensitization).

### 433 Discussion

434 In the current study we set out to test whether pain-free, Sensorimotor Peak Alpha Frequency (PAF) is a  
435 specific and reliable predictor of prolonged pain. We found that pain-free, Sensorimotor PAF could  
436 predict Capsaicin Heat-Pain sensitivity (CHP), with increasingly slower PAF being associated with

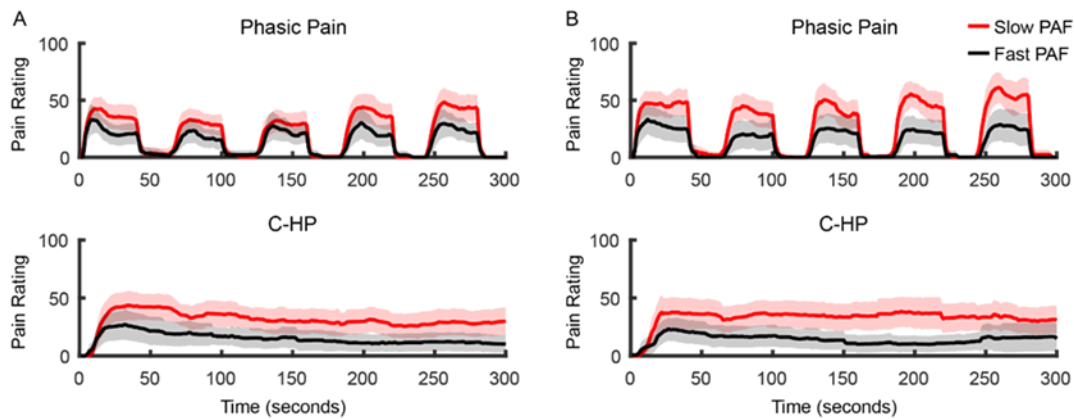

Figure 7. Differences between “Slow” And “Fast” PAF groups are present immediately across the entire prolonged pain time-course during V1 (A) and V2 (B). Solid lines represent the group average and shaded lines the +/- 95% confidence interval.

437 increasingly greater CHP intensity, at both short (45 minutes) and long (8 week) timescales. We also  
438 found that pain-free, sensorimotor PAF shares a near identical relationship with a second test of  
439 prolonged pain, Phasic Heat Pain (PHP). While both CHP and PHP produce sensitization and similar  
440 amounts of pain, the actual procedures used differ in the length of application, the temperatures used,  
441 and the presence of sensitizing agent. In light of the fact that PAF was not related to two standard tests  
442 of acute thermal processing, warmth detection threshold (WDT) and heat pain threshold (HPT), these  
443 differences between the tasks provides an important measure of comfort that PAF is related to the  
444 characteristic shared by each task, perhaps the prolonged nature of the pain, rather than non-pain  
445 variables that are unique to each task.

446 Peak Alpha Frequency (PAF) is an alpha rhythm characteristic hypothesized to represent processes that  
447 control the speed of perceptual cycles (e.g. Samaha & Postle, 2015; Cecere et al., 2015; Wutz et al.,  
448 2018). Previous investigations of PAF and chronic pain (e.g. Sarnthein et al., 2006; de Vries et al., 2013;  
449 Lim et al., 2016) have reliably found that PAF is slowed in patients, leading many to suggest that  
450 disturbances in PAF reflect ongoing, pathological processes. Earlier hypotheses about the role of  
451 disrupted communication between the thalamus and cortex in chronic pain, so called Thalamocortical  
452 Dysrhythmias (e.g. Llinás et al., 1999), have proven particularly influential in providing context for these  
453 interpretations. Alongside these findings, work from both our lab and others has demonstrated that PAF  
454 recorded in the absence of pain can serve to distinguish high and low pain sensitive individuals in the  
455 healthy population (Nir et al., 2010; Furman et al., 2018). These findings have led us to hypothesize that  
456 PAF is a biomarker of pain sensitivity in healthy individuals and to propose that apparent chronic pain  
457 disturbances of PAF may, at least in part, reflect differences in prolonged pain sensitivity that predate  
458 disease onset.

459 We were able to replicate our previous finding that sensorimotor PAF collected during a pain-free  
460 resting state can predict future pain sensitivity to the CHP model. This replication is notable because the  
461 sample size used in the current study was nearly double that used previously thereby giving us  
462 confidence that our previous results were not a consequence of spurious effects associated with small  
463 sample sizes. Furthermore, our results extend these prior findings by clearly establishing that prolonged  
464 pain sensitivity is a trait-like characteristic. Three key points justify this conclusion. First, we were unable  
465 to identify a significant effect of Visit or Visit X Type in our linear mixed model suggesting that pain  
466 intensities for both CHP and PHP do not change across the two testing visits. Second, pain intensities for

467 both prolonged pain tests are strongly correlated across visits. Indeed, we found these tests were  
468 generally more reliable than either warmth detection (WDT) or heat pain thresholds (HPT). This is  
469 somewhat surprising given that WDT and HPT are considered gold standards of quantitative sensory  
470 testing (e.g. Rolke et al., 2006) while prolonged pain paradigms are used less often. Third, the average  
471 interval between visits was more than 7 weeks making it unlikely that the reliability of pain scores is  
472 biased by the participant's memory of earlier pain ratings. The fact that participants completed these  
473 tasks without any haptic or visual feedback of their ratings also argue against this interpretation.  
474 Instead, the most parsimonious explanation of these results is that prolonged pain sensitivity is a stable  
475 individual characteristic.

476 Beyond showing that Sensorimotor PAF is similarly related to two different tests of prolonged pain, we  
477 also demonstrate that this relationship is reliable across multiple time points. At both V1 and V2, pain-  
478 free, sensorimotor PAF was negatively related to CHP and PHP intensities; for both visits, individuals  
479 with increasingly slower PAF experienced increasingly greater CHP or PHP intensities. It should be noted  
480 that this relationship was qualitatively stronger at V2, which may suggest that a portion of the PAF's  
481 predictive ability is related to factors associated with a participant's familiarity with the sensory tests.  
482 The fact that this relationship was present at V1, where participants experienced the PHP paradigm for  
483 the very first time, argues against familiarity as the sole factor responsible, however.

484 One of the most intriguing results of the current study is that V1 estimates of sensorimotor PAF can  
485 predict V2 prolonged pain scores. This finding not only demonstrates that, in addition to providing  
486 separate predictions at each time point, a single estimate of sensorimotor PAF can also provide cogent  
487 predictions of pain sensitivity at multiple time points. This appears to be a result of the fact that both  
488 sensorimotor PAF and prolonged pain sensitivity do not change much over time in healthy individuals.

489 Exposing participants to thermal tests that varied in their noxious content (innocuous vs. noxious) and  
490 their duration (acute vs. prolonged) allowed us to begin probing the boundaries of the sensorimotor  
491 PAF-pain sensitivity relationship. While we were able to find reliable relationships between prolonged  
492 pain and sensorimotor PAF, we could not find any evidence of a similar correlation to either WDT or  
493 HPT. These absences provide preliminary evidence that PAF is not related to either innocuous heat  
494 processing or to transient pain events. It should be cautioned, however, that this apparent specificity  
495 may reflect differences in the rating procedures used between tests. Whereas both prolonged pain  
496 paradigms require participants to make continuous, magnitude judgements, WDT and HPT involve a  
497 single "stop" decision and are thus influenced by additional factors like reaction time. Additional studies  
498 that can control for this discrepancy are needed to ensure that the current results are due to the type of  
499 stimulation rather than the type of response. Nonetheless, the WDT results appear to argue against a  
500 purely perceptual role for PAF in thermal processing, similar to what has been shown for tactile  
501 discrimination (Baumgarten et al., 2017); in theory, faster PAF should be associated with lower WDT  
502 since shorter intervals between sampling bouts should promote more rapid change detection.  
503 Ultimately, multi-modal imaging (i.e. EEG-fMRI) is still needed to firmly assess whether PAF exerts its  
504 effects in or outside of the sensorimotor system.

505 As in our first study, median split analysis suggests that pain-free, Sensorimotor PAF may be a useful tool  
506 for separating individuals into "high" and "low" prolonged pain sensitivity groups. A crucial difference  
507 from our previous approach, however, is that we performed our median split on Sensorimotor PAF  
508 estimates rather than pain scores. We did this to more directly simulate what might happen in a clinical



509 setting where only PAF estimates are available. Indeed, our findings suggest that clinicians could  
510 potentially use pre-intervention PAF to inform pain management decisions so that post-surgical  
511 treatment is personalized to both the intervention and the participant's expected pain sensitivity. Such  
512 an approach could pay dividends in reducing opiate burdens by helping practitioners identify patients  
513 who are unlikely to need opiate pain relief. An unexpected result of our median split is that differences  
514 between PAF speed groups were present immediately and persisted throughout the entire prolonged  
515 pain time course. This suggests that PAF's relationship to pain is mediated by processes that organize  
516 general responses to pain, such as attention (i.e. Miron et al., 1989; Klimesch, 2012; Guilbinaite et al.,  
517 2017), rather than specific pain processes, like sensitization, that determine particular elements of the  
518 pain experience.

519 In summary, our results clearly demonstrate that sensorimotor PAF is a reliable predictor of prolonged  
520 pain sensitivity. In addition to replicating the relationship between sensorimotor PAF and prolonged  
521 pain sensitivity, we now provide compelling evidence that this relationship is stable over both  
522 immediate, i.e. minutes/hours, and more extended, i.e. weeks/months, periods of time. Furthermore,  
523 we provide preliminary findings that sensorimotor PAF is a specific biomarker for prolonged pain  
524 sensitivity and that splitting participants based on pain-free PAF can provide meaningful information for  
525 identifying high and low pain sensitivity individuals. These findings now firmly position sensorimotor PAF  
526 as a biomarker of pain sensitivity with untapped potential in clinical settings.

## 527 **References**

- 528 Baron, R. (2009). Neuropathic pain: a clinical perspective. *Handbook of Experimental Pharmacology*,  
529 (194), 3–30.
- 530 Baumgarten, T. J., Schnitzler, A., & Lange, J. (2017). Beyond the Peak - Tactile Temporal Discrimination  
531 Does Not Correlate with Individual Peak Frequencies in Somatosensory Cortex. *Frontiers in*  
532 *Psychology*, 8, 421.
- 533 Bazanova, O. M., & Vernon, D. (2014). Interpreting EEG alpha activity. *Neuroscience and Biobehavioral*  
534 *Reviews*, 44, 94–110.
- 535 Cecere, R., Rees, G., & Romei, V. (2015). Individual differences in alpha frequency drive crossmodal  
536 illusory perception. *Current Biology: CB*, 25(2), 231–235.
- 537 Culp, W. J., Ochoa, J., Cline, M., & Dotson, R. (1989). Heat and mechanical hyperalgesia induced by  
538 capsaicin. Cross modality threshold modulation in human C nociceptors. *Brain: A Journal of*  
539 *Neurology*, 112 ( Pt 5), 1317–1331.
- 540 de Vries, M., Wilder-Smith, O. H., Jongasma, M. L., van den Broeke, E. N., Arns, M., van Goor, H., & van  
541 Rijn, C. M. (2013). Altered resting state EEG in chronic pancreatitis patients: toward a marker for  
542 chronic pain. *Journal of Pain Research*, 6, 815–824.
- 543 Delorme, A., & Makeig, S. (2004). EEGLAB: an open source toolbox for analysis of single-trial EEG  
544 dynamics including independent component analysis. *Journal of Neuroscience Methods*, 134(1), 9–  
545 21.
- 546 Diatchenko, L., Slade, G. D., Nackley, A. G., Bhalang, K., Sigurdsson, A., Belfer, I., ... Maixner, W. (2005).  
547 Genetic basis for individual variations in pain perception and the development of a chronic pain  
548 condition. *Human Molecular Genetics*, 14(1), 135–143.

- 549 Furman, A. J., Meeker, T. J., Rietschel, J. C., Yoo, S., Muthulingam, J., Prokhorenko, M., ... Seminowicz, D.  
550 A. (2018). Cerebral peak alpha frequency predicts individual differences in pain sensitivity.  
551 *NeuroImage*, *167*, 203–210.
- 552 Gaskin, D. J., & Richard, P. (2012). The economic costs of pain in the United States. *The Journal of Pain: Official Journal of the American Pain Society*, *13*(8), 715–724.
- 554 Gulbinaite, R., van Viegen, T., Wieling, M., Cohen, M. X., & VanRullen, R. (2017). Individual alpha peak  
555 frequency predicts 10 Hz flicker effects on selective attention. *Journal of Neuroscience*, *37*(42),  
556 10173-10184.
- 557 Haegens, S., Cousijn, H., Wallis, G., Harrison, P. J., & Nobre, A. C. (2014). Inter-and intra-individual  
558 variability in alpha peak frequency. *Neuroimage*, *92*, 46-55.
- 559 Granot, M., Granovsky, Y., Sprecher, E., Nir, R.-R., & Yarnitsky, D. (2006). Contact heat-evoked temporal  
560 summation: tonic versus repetitive-phasic stimulation. *Pain*, *122*(3), 295–305.
- 561 Henriques, F. C., & Moritz, A. R. (1947). Studies of Thermal Injury. *The American Journal of Pathology*,  
562 *23*(4), 530–549.
- 563 Jensen, O., & Mazaheri, A. (2010). Shaping functional architecture by oscillatory alpha activity: gating by  
564 inhibition. *Frontiers in Human Neuroscience*, *4*, 186.
- 565 Katz, J., Jackson, M., Kavanagh, B. P., & Sandler, A. N. (1996). Acute pain after thoracic surgery predicts  
566 long-term post-thoracotomy pain. *The Clinical Journal of Pain*, *12*(1), 50–55.
- 567 Kennedy, J., Roll, J. M., Schraudner, T., Murphy, S., & McPherson, S. (2014). Prevalence of persistent  
568 pain in the U.S. adult population: new data from the 2010 national health interview survey. *The*  
569 *Journal of Pain: Official Journal of the American Pain Society*, *15*(10), 979–984.
- 570 Kennedy, W. R., Vanhove, G. F., Lu, S.-P., Tobias, J., Bley, K. R., Walk, D., ... Selim, M. M. (2010). A  
571 randomized, controlled, open-label study of the long-term effects of NGX-4010, a high-  
572 concentration capsaicin patch, on epidermal nerve fiber density and sensory function in healthy  
573 volunteers. *The Journal of Pain: Official Journal of the American Pain Society*, *11*(6), 579–587.
- 574 Klimesch, W., Schimke, H., & Pfurtscheller, G. (1993). Alpha frequency, cognitive load and memory  
575 performance. *Brain Topography*, *5*(3), 241–251.
- 576 Klimesch, Wolfgang. (2012).  $\alpha$ -band oscillations, attention, and controlled access to stored information.  
577 *Trends in Cognitive Sciences*, *16*(12), 606–617.
- 578 LaMotte, R. H., Lundberg, L. E., & Torebjörk, H. E. (1992). Pain, hyperalgesia and activity in nociceptive C  
579 units in humans after intradermal injection of capsaicin. *The Journal of Physiology*, *448*, 749–764.
- 580 Lim, M., Kim, J. S., Kim, D. J., & Chung, C. K. (2016). Increased Low- and High-Frequency Oscillatory  
581 Activity in the Prefrontal Cortex of Fibromyalgia Patients. *Frontiers in Human Neuroscience*, *10*,  
582 111.
- 583 Liu, M., Max, M. B., Robinovitz, E., Gracely, R. H., & Bennett, G. J. (1998). The human capsaicin model of  
584 allodynia and hyperalgesia: sources of variability and methods for reduction. *Journal of Pain and*  
585 *Symptom Management*, *16*(1), 10–20.
- 586 Llinás, R. R., Ribary, U., Jeanmonod, D., Kronberg, E., & Mitra, P. P. (1999). Thalamocortical dysrhythmia:  
587 A neurological and neuropsychiatric syndrome characterized by magnetoencephalography.  
588 *Proceedings of the National Academy of Sciences of the United States of America*, *96*(26), 15222–  
589 15227.

- 590 Lötsch, J., Dimova, V., Hermens, H., Zimmermann, M., Geisslinger, G., Oertel, B. G., & Ultsch, A. (2015).  
591 Pattern of neuropathic pain induced by topical capsaicin application in healthy subjects. *Pain*,  
592 *156*(3), 405–414.
- 593 Mazaheri, A., van Schouwenburg, M. R., Dimitrijevic, A., Denys, D., Cools, R., & Jensen, O. (2014).  
594 Region-specific modulations in oscillatory alpha activity serve to facilitate processing in the visual  
595 and auditory modalities. *NeuroImage*, *87*, 356–362.
- 596 Mierau, A., Klimesch, W., & Lefebvre, J. (2017). State-dependent alpha peak frequency shifts:  
597 Experimental evidence, potential mechanisms and functional implications. *Neuroscience*, *360*, 146–  
598 154.
- 599 Miron, D., Duncan, G. H., & Bushnell, M. C. (1989). Effects of attention on the intensity and  
600 unpleasantness of thermal pain. *Pain*, *39*(3), 345–352.
- 601 Nir, R.-R., Sinai, A., Raz, E., Sprecher, E., & Yarnitsky, D. (2010). Pain assessment by continuous EEG:  
602 association between subjective perception of tonic pain and peak frequency of alpha oscillations  
603 during stimulation and at rest. *Brain Research*, *1344*, 77–86.
- 604 Nolano, M., Simone, D. A., Wendelschafer-Crabb, G., Johnson, T., Hazen, E., & Kennedy, W. R. (1999).  
605 Topical capsaicin in humans: parallel loss of epidermal nerve fibers and pain sensation. *Pain*, *81*(1–  
606 2), 135–145.
- 607 Oostenveld, R., & Praamstra, P. (2001). The five percent electrode system for high-resolution EEG and  
608 ERP measurements. *Clinical Neurophysiology: Official Journal of the International Federation of*  
609 *Clinical Neurophysiology*, *112*(4), 713–719.
- 610 Oostenveld, Robert, Fries, P., Maris, E., & Schoffelen, J.-M. (2011). FieldTrip: Open source software for  
611 advanced analysis of MEG, EEG, and invasive electrophysiological data. *Computational Intelligence*  
612 *and Neuroscience*, *2011*, 156869.
- 613 Rolke, R., Baron, R., Maier, C., Tölle, T. R., Treede, R.-D., Beyer, A., ... Wasserka, B. (2006). Quantitative  
614 sensory testing in the German Research Network on Neuropathic Pain (DFNS): standardized  
615 protocol and reference values. *Pain*, *123*(3), 231–243.
- 616 Rouder, J. N., Speckman, P. L., Sun, D., Morey, R. D., & Iverson, G. (2009). Bayesian t tests for accepting  
617 and rejecting the null hypothesis. *Psychonomic bulletin & review*, *16*(2), 225–237.
- 618 Samaha, J., & Postle, B. R. (2015). The Speed of Alpha-Band Oscillations Predicts the Temporal  
619 Resolution of Visual Perception. *Current Biology: CB*, *25*(22), 2985–2990.
- 620 Sarnthein, J., Stern, J., Aufenberg, C., Rousson, V., & Jeanmonod, D. (2006). Increased EEG power and  
621 slowed dominant frequency in patients with neurogenic pain. *Brain: A Journal of Neurology*, *129*(Pt  
622 1), 55–64.
- 623 Seminowicz, D. A., Thapa, T., Furman, A. J., Summers, S. J., Cavaleri, R., Fogarty, J. S., ... & Schabrun, S.  
624 M. (2018). Slow peak alpha frequency and corticomotor depression linked to high pain  
625 susceptibility in transition to sustained pain. bioRxiv, 278598.
- 626 VanRullen, R. (2016). Perceptual cycles. *Trends in cognitive sciences*, *20*(10), 723–735.
- 627 Walls, T., Burton, E., Peterlin, L., & Campbell, C. (2017). (207) Sex differences in the perception of pain  
628 from topical capsaicin. *The Journal of Pain*, *18*(4), S27–S28.

629 Wutz, A., Melcher, D., & Samaha, J. (2018). Frequency modulation of neural oscillations according to  
630 visual task demands. *Proceedings of the National Academy of Sciences of the United States of*  
631 *America*, 115(6), 1346–1351.

### 632 Supplemental Data

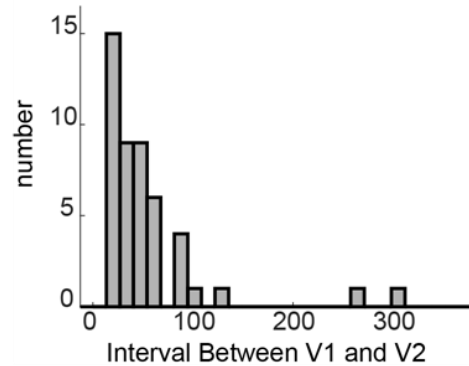

Figure S1. Histogram of days separating Visit 1 and Visit 2 sessions. On average visits were separated by 54.74 days (7.82 weeks).

### 633 634 *PHP and CHP Produce Sensitization*

635 We first sought to determine whether sensitization, a putative hallmark of prolonged pain, is present in  
636 our two prolonged pain paradigms. Inspection of the PHP time course suggest that following a decrease  
637 in pain ratings from the first to the second PHP trial, which may reflect the enhanced salience of the first  
638 stimulus (Ianetti et al., 2008), ratings increased linearly from the second to fifth PHP trial (Figure 1B). To  
639 formally test this observation, we calculated the average pain rating for PHP trials 2 and 5 for all  
640 participants, regardless of pain classification, and submitted these scores to a linear mixed model with  
641 participants as random effects (slope included) and Visit (V1 vs. V2), Trial (2 vs. 5) and the Visit X Trial  
642 interaction as fixed effects. If PHP scores sensitize over time, then a significant main effect of Trial  
643 should be present. This analysis revealed a significant main effect of Trial,  $F_{(1,88.14)} = 19.06, p < .01$ ,  
644 without a significant main effect of Visit,  $F_{(1,103.08)} = .35, p = .55$ , or significant Visit X Trial interaction,  
645  $F_{(1,88.18)} = .02, p = .89$ . The estimated effect of Trial on PHP scores 8.61(95% Confidence Intervals: 2.13 –  
646 15.10). This increase in scores from trial 2 (mean = 20.81, S.D. = 17.88) to trial 5 (mean = 29.31, S.D. =  
647 21.43) in response to the same noxious stimulus is evidence of sensitization.

648 Two findings support the presence of sensitization during CHP. First, across all participants, a pair of  
649 one-sample t-tests revealed that CHP scores were significantly greater than 0 at both V1,  $t_{(57)} = 6.63, p <$   
650  $.01$ , and V2,  $t_{(42)} = 5.72, p < .01$ . Second, another pair of one-sample t-tests indicated that HPTs were  
651 significantly greater than the CHP temperature, 40°C, at both V1,  $t_{(57)} = 7.90, p < .01$ , and V2,  $t_{(39)} = 8.89,$   
652  $p < .01$ . We believe that this pain response to a sub-WDT temperature is a strong indicator of  
653 sensitization given that we have previously demonstrated that a similar temperature in the absence of  
654 capsaicin does not produce pain (Furman et al., 2018).

### 655 *CHP Scores Vary Across Visits as a Function of Sex*

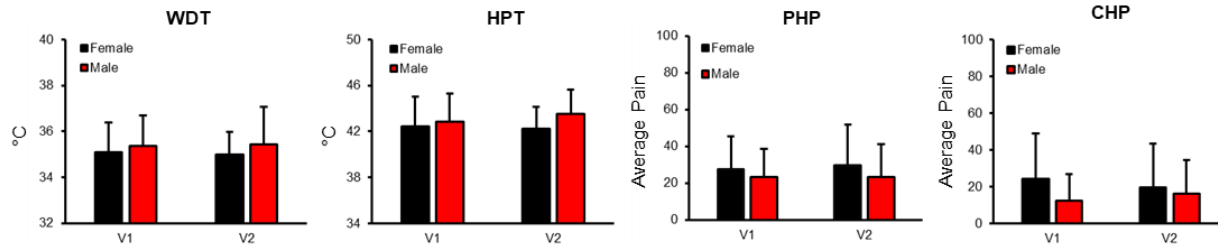

Figure S2. Sensory test scores broken by sex and visit. CHP scores show a significant Visit X Sex interaction – scores increase for men from V1 to V2 and decrease for women from V1 to V2.

656 Average scores (+ 1 S.D) for the sexes on each test at each visit can be seen in Supplementary Figure 2.  
657 Previous studies have reported that sex may be an important variable in determining pain sensitivity (i.e.  
658 Dao & LeResche, 2000).

659 To determine whether sex may play a role in our sensory tests, we performed four, separate linear  
660 mixed models, one for each sensory test, with subjects as random effects and Visit (V1 vs V2), Sex (Male  
661 vs. Female), and the Visit X Sex interaction as fixed effects. Given that our study was not powered with  
662 respect to gender effects, analyses were performed on all participants regardless of pain classification in  
663 order to maximize available statistical power. For PHP scores, this analysis revealed no significant effects  
664 of Visit,  $F_{(1,41.34)} = .37, p = .54$ , Gender,  $F_{(1,53.35)} = 1.72, p = .20$ , or Visit X Gender interaction,  $F_{(1,41.34)} = .76, p$   
665  $= .39$ . For CHP scores, this analysis revealed a significant Visit by Gender interaction,  $F_{(1,41.86)} = 8.95, p <$   
666  $.01$ , but no significant main effects of Visit,  $F_{(1,41.86)} = .06, p = .80$ , or Gender,  $F_{(1,54.53)} = 1.38, p = .25$ . For  
667 WDT scores, this analysis revealed no significant effects of Visit,  $F_{(1,44.39)} = .004, p = .95$ , Gender,  $F_{(1,56.14)} =$   
668  $1.08, p = .30$ , or Visit X Gender interaction,  $F_{(1,44.39)} = .00, p > .99$ . For HPT scores, this analysis revealed no  
669 significant effects of Visit,  $F_{(1,47.64)} = .81, p = .37$ , Gender,  $F_{(1,56.16)} = 1.53, p = .22$ , or Visit X Gender  
670 interaction,  $F_{(1,47.54)} = .81, p = .37$ .

671 Other than CHP it appears that there are no clear sex differences in sensory test scores. For CHP, the  
672 Visit X Gender interaction reflects the fact that males experience increases in CHP scores from V1 (mean  
673 = 12.10, S.D. = 14.50) to V2 (mean = 16.12, S.D. = 18.44), whereas females experience decreases in CHP  
674 scores from V1 (mean = 24.37, S.D. = 24.45) to V2 (mean = 20.01, S.D. = 23.06).

#### 675 *The PAF-Pain Sensitivity Relationship is Similar for Both Sexes*

676 One important consideration for any pain biomarker is whether it applies equally to both sexes.  
677 Inspection of correlation magnitudes for each sex revealed that PAF-pain sensitivity relationships were  
678 roughly equivalent between the sexes on both tests at each visit (Supplementary Figure 3). We do not  
679 provide  $p$  values for these tests as our study was not powered to investigate sex differences directly.

680 To more formally test whether sex influences the relationship of PAF to pain sensitivity, we performed  
681 four, separate moderation analyses (one for PHP and CHP at each visit) using PROCESS (V3.2; Hayes,  
682 2012) implemented in SPSS. In these regression analyses, sensory test scores served as the dependent  
683 variable with PAF as the independent variable and sex as a dichotomous moderator variable. As with  
684 other correlational analyses, we excluded PAF or sensory test scores greater than 2.5 SD above the  
685 mean. To account for possible multi-collinearity, independent variables and moderators were mean-  
686 centered. In our moderation analyses, a significant interaction of sex and PAF would indicate that the  
687 relationship between PAF and pain sensitivity is different for the two sexes. We were unable, however,  
688 to identify a significant PAF x Sex interaction for PHP scores at either V1,  $t = -.16, p = .87$ , or V2,  $t = .74, p$   
689  $= .47$ . Similarly, there was not a significant effect of PAF x Sex for CHP scores at either V1,  $t = -.01, p =$

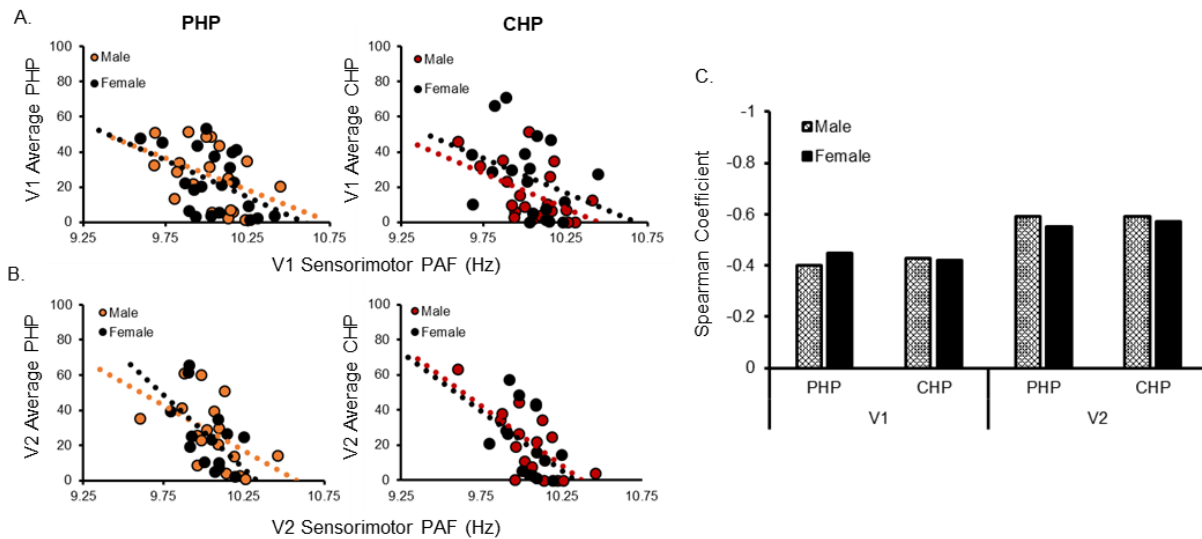

Figure S3. Correlations between PAF and prolonged pain paradigms are statistically identical at both Visit 1 (A) and Visit 2 (B). Note that statistical outliers are not presented in the figure but were not included in any analyses. Spearman correlation coefficients for each gender, prolonged pain paradigm, and visit are presented in C.

690

691 .99, or V2,  $t < .01$ ,  $p > .99$ . According to our moderation analyses we can conclude that the PAF-pain

692 sensitivity relationship is not different for the two sexes.

### 693 *The PAF-Pain Sensitivity Relationship is Evident Across the Entire Scalp*

694 Previously unpublished findings from our lab have suggested that the PAF-pain sensitivity relationship is  
 695 not privileged to sensors overlying the sensorimotor cortex. To determine whether similar conclusions  
 696 can be drawn from the current dataset, we first calculated PAF separately for each individual at each of  
 697 the 63 EEG sensors. Next, we correlated PAF estimates from each sensor with scores on each sensory  
 698 test to yield a total of 63 correlation values for each test. To visualize these results, we then plotted the  
 699 distribution of correlation values for each sensory test with a histogram. As can be seen in  
 700 Supplementary Figure 4, the distribution of sensor correlations largely recapitulated what we found  
 701 when we focused only on our sensorimotor ROI. Specifically, we found that correlations between PAF  
 702 and either CHP or PHP were moderately large and in the negative direction. In comparison, correlations  
 703 between PAF and either WDT or PHP were much smaller across the board.

### 704 *PAF Does Not Reflect Sensitivity to Sensitization Processes*

705 Qualitative differences in pain ratings are evident across the entire time courses of both the Phasic Pain  
 706 and C-HP paradigms (Figure 7). As noted above, both CHP and PHP produce sensitization which might  
 707 suggest that are differences in sensitization between PAF speed groups. To test whether PAF may be  
 708 related to the amount of sensitization experienced by an individual, we analyzed PHP sensitization  
 709 scores, calculated by subtracting trial 5 from trial 2 pain scores, using a linear mixed model with subjects  
 710 as subjects as random effects (intercept included) and Visit (V1 vs V2), Speed (Slow vs. Fast), and the  
 711 Visit X Speed interaction as fixed effects. We could not find any evidence of a relationship between PAF  
 712 and sensitization as neither the main effect of Speed,  $F_{(1,32.24)} = 2.82$ ,  $p = .10$ , nor the Speed x Visit  
 713 interaction,  $F_{(1,29.21)} = .16$ ,  $p = .69$ , were significant. Similarly, there were no differences between  
 714 sensitization scores as a function of Visit,  $F_{(1,29.21)} = .06$ ,  $p = .81$ .

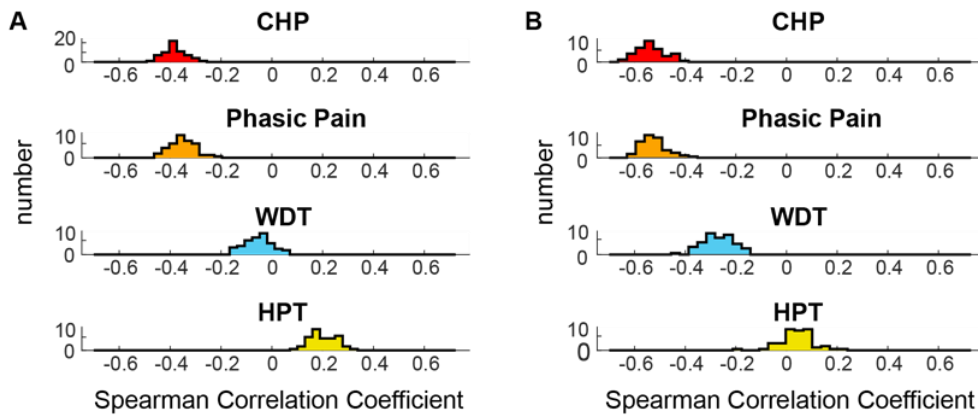

Figure S4. Pattern of sensorimotor PAF-sensory test scores is observable across the entire EEG montage. For each sensory test, and each of the 63 individual EEG sensors, we computed the Spearman correlation between sensor-level PAF and sensory test scores yielded a total of 63 correlations for each sensory test. Graphs display the histograms of these correlations at V1 (A) and V2 (B).

715

## 716 Supplemental References

717 Dao, T. T., & LeResche, L. (2000). Gender differences in pain. *Journal of orofacial pain*, 14(3).

718 Hayes, A. F. (2012). PROCESS: A versatile computational tool for observed variable mediation,  
719 moderation, and conditional process modeling.

720 Iannetti, G. D., Hughes, N. P., Lee, M. C., & Mouraux, A. (2008). Determinants of laser-evoked EEG  
721 responses: pain perception or stimulus saliency?. *Journal of neurophysiology*, 100(2), 815-828.
